# Neglected Tropical Diseases in the Catholic World

Peter J. Hotez<sup>1,2\*</sup>

**1** Sabin Vaccine Institute, Washington, D.C., United States of America, **2** Department of Microbiology, Immunology, and Tropical Medicine, George Washington University Medical Center, Washington, D.C., United States of America

*Roughly one-quarter of the world's most common neglected tropical diseases and almost all of the cases of Chagas disease occur in the Catholic majority countries of Africa, Asia, and Latin America. This finding highlights new opportunities to lift the poorest Catholics in developing countries out of poverty.*

The neglected tropical diseases (NTDs) are the most common infections of the world's poorest people living in developing countries. Through their impact on child growth and development, pregnancy outcome, and worker productivity, the NTDs cause a massive global disease burden and have also been shown to promote poverty and economic underdevelopment [1]. In previous analyses, I have suggested that the NTDs are not evenly distributed throughout the developing countries of the tropics [2,3]. Instead, approximately 30%–50% of the most common NTDs, such as intestinal helminth infections, schistosomiasis, and trachoma, occur in the nations that comprise the Organisation of the Islamic Conference, especially the poorest Islamic countries in Asia and Africa [2]. Another 20%–30% of these high prevalence NTDs are found among the poorest people who live in large middle-income countries such as India, China, Pakistan, and Iran. Despite their huge disparities of income and levels of poverty, ironically, these same countries also have tremendous scientific prowess, including the capacity to produce and maintain nuclear arsenals [3].

The next largest category of countries with a high prevalence of NTDs is countries with Catholic majorities. Listed in Table 1 (and shown in Figure 1) are the nations where most of the world's 1.1 billion Catholics live [4]. Only countries with Catholic majorities are included (in addition to Canada and Uganda, each with more than 40% of its population Catholic). Not included are large NTD disease-endemic nations such as India, Indonesia, Kenya, Nigeria, and Vietnam that contain sizeable Catholic minority populations. At least 5 million Catholics live in each of the 31 countries in Table 1, and together the 818 million Catholics living in these countries comprise three-quarters of the world's Catholic population. Seventeen of the countries are in the Latin American and

Caribbean region, led by Brazil and Mexico (the most populous Catholic countries with 146 million and 123 million Catholics each, respectively), followed by the Philippines, as the only Asian country on the list (70 million), and the European nations of Italy and France. Four sub-Saharan African countries are listed in Table 1, including the Democratic Republic of Congo (DRC) with 30 million Catholics, Angola and Uganda (10–11 million each), and Burundi (5 million).

While none of the eight European countries (or Canada) in Table 1 suffer from widespread NTDs, all of the Latin American nations listed, as well as the African Catholic countries and the Philippines, are highly endemic for such conditions. Together, these 22 nations comprise a significant percentage of the world's NTDs (Table 1), including almost 100% of the Chagas cases, which are found overwhelmingly in Latin America [5], and 21%–27% of the world's intestinal helminth infections, led by Brazil in Latin America, the Philippines in Asia, and DRC in sub-Saharan Africa [6,7]. The 22 most populous NTD-endemic Catholic countries also account for 14%–16% of the world's 207 million cases of schistosomiasis [8,9], and lymphatic filariasis (LF), onchocerciasis, or both of these infections are transmitted in 13 of the 22 nations [10,11].

A critical policy implication of these findings is that the major Catholic charities and perhaps even the Catholic Church has a unique opportunity to promote NTD control in several of the 22 most endemic Catholic majority countries. To-

day, several Catholic charities are making significant contributions to global public health, including efforts to promote “deworming”, i.e., mass drug administration for human intestinal helminth infections. Catholic Relief Services has assisted poor and vulnerable populations for over 60 years [12,13], with specific efforts to provide deworming treatments for school-aged children in Benin [14], Ghana [15], and presumably elsewhere in over 30 African countries where they work [16], while also operating community health programs in 26 countries that serve 3.5 million people [17]. Similarly, the Catholic Medical Mission Board, which was founded in 1928 by Dr. Paluel Flagg after a visit to Haiti to help leprosy patients, has provided support to health care programs in developing countries since 1966 and today distributes hundreds of millions of dollars worth of medicines annually [18]. Many local archdioceses, including the Roman Catholic Archdiocese of Manila through its Caritas Manila program, for example, also provide deworming treatments [19]. Of interest is the finding that many Catholic organizations operate in countries both with and without Catholic majority populations, recognizing health as a fundamental right for people of all denominations [16,17].

The important work of the major Catholic charities and the Church could ultimately be expanded to support national programs of NTD control and elimination. Currently, the United States Agency for International Development (USAID) is supporting integrated control of the seven most common NTDs through low-cost

**Citation:** Hotez PJ (2011) Neglected Tropical Diseases in the Catholic World. *PLoS Negl Trop Dis* 5(4): e1132. doi:10.1371/journal.pntd.0001132

**Published:** April 26, 2011

**Copyright:** © 2011 Peter J. Hotez. This is an open-access article distributed under the terms of the Creative Commons Attribution License, which permits unrestricted use, distribution, and reproduction in any medium, provided the original author and source are credited.

**Funding:** The author received no specific funding for this work.

**Competing Interests:** PJH is a co-founder of the Global Network for Neglected Tropical Diseases. He is an inventor on U.S. Patent 7,303,752 B2 (issued December 4, 2007) entitled “Hookworm vaccine”.

\* E-mail: Photez@gwu.edu or peter.hotez@sabin.org

Peter J. Hotez, MD, PhD, is Distinguished Research Professor, the Walter G. Ross Professor and Chair of the Department of Microbiology, Immunology, and Tropical Medicine, The George Washington University, and President of the Sabin Vaccine Institute.

**Table 1. NTDs in the Catholic World.**

| # <sup>a,b</sup> | Country <sup>a,b</sup>        | Catholics <sup>a,b</sup>  | % Catholic <sup>a,b</sup> | Cases of Ascariasis <sup>c</sup> | Cases of Trichuriasis <sup>c</sup> | Cases of Hookworm <sup>c</sup> | Cases of Schistosomiasis <sup>d</sup> | LF or Oncho Transmission +/- <sup>e</sup> | Chagas Transmission +/- <sup>f,g</sup> |
|------------------|-------------------------------|---------------------------|---------------------------|----------------------------------|------------------------------------|--------------------------------|---------------------------------------|-------------------------------------------|----------------------------------------|
| 1                | Brazil                        | 145 million               | 79%                       | 42 million                       | 19 million                         | 32 million                     | 2–7 million                           | +                                         | +                                      |
| 2                | Mexico                        | 123 million               | 87%                       | 9 million                        | 18 million                         | 1 million                      | —                                     | +                                         | +                                      |
| 3                | Philippines                   | 70 million                | 81%                       | 41 million                       | 38 million                         | 18 million                     | <1 million                            | +                                         | —                                      |
| 4                | Italy                         | 58 million                | 97%                       | —                                | —                                  | —                              | —                                     | —                                         | —                                      |
| 5                | France                        | 44 million                | 76%                       | —                                | —                                  | —                              | —                                     | —                                         | —                                      |
| 6                | Colombia                      | 38 million                | 86%                       | 6 million                        | 15 million                         | 3 million                      | —                                     | +                                         | +                                      |
| 7                | Spain                         | 37 million                | 88%                       | —                                | —                                  | —                              | —                                     | —                                         | —                                      |
| 8                | Poland                        | 35 million                | 94%                       | —                                | —                                  | —                              | —                                     | —                                         | —                                      |
| 9                | Argentina                     | 34 million                | 89%                       | 8 million                        | 3 million                          | 2 million                      | —                                     | —                                         | +                                      |
| 10               | DRC                           | 30 million                | 50%                       | 23 million                       | 26 million                         | 31 million                     | 15 million                            | +                                         | —                                      |
| 11               | Peru                          | 28 million                | 88%                       | 7 million                        | 8 million                          | 1.5 million                    | —                                     | —                                         | +                                      |
| 12               | Venezuela                     | 25 million                | 88%                       | 7 million                        | 9 million                          | 1.5 million                    | —                                     | +                                         | +                                      |
| 13               | Canada                        | 13 million                | 44%                       | —                                | —                                  | —                              | —                                     | —                                         | —                                      |
| 14               | Ecuador                       | 12 million                | 90%                       | 5 million                        | 2 million                          | 1 million                      | —                                     | +                                         | +                                      |
| 15               | Uganda                        | 11 million                | 42%                       | 4 million                        | 3 million                          | 9 million                      | 5 million                             | +                                         | —                                      |
| 16               | Chile                         | 11 million                | 71%                       | 3 million                        | 3 million                          | —                              | —                                     | —                                         | +                                      |
| 17               | Guatemala                     | 10 million                | 77%                       | 8 million                        | 9 million                          | 3 million                      | —                                     | +                                         | +                                      |
| 18               | Angola                        | 10 million                | 50%                       | 3 million                        | <1 million                         | 11 million                     | 6 million                             | +                                         | —                                      |
| 19               | Portugal                      | 9 million                 | 90%                       | —                                | —                                  | —                              | —                                     | —                                         | —                                      |
| 20               | Bolivia                       | 8 million                 | 85%                       | 1 million                        | <1 million                         | 1 million                      | —                                     | —                                         | +                                      |
| 21               | Dom. Rep.                     | 8 million                 | 86%                       | <1 million                       | <1 million                         | <1million                      | <1 million                            | +                                         | —                                      |
| 22               | Belgium                       | 8 million                 | 76%                       | —                                | —                                  | —                              | —                                     | —                                         | —                                      |
| 23               | Haiti                         | 7 million                 | 65%                       | 3 million                        | 4 million                          | 1 million                      | —                                     | +                                         | —                                      |
| 24               | Cuba                          | 6 million                 | 50%                       | <1million                        | 3 million                          | 1 million                      | —                                     | —                                         | —                                      |
| 25               | Hungary                       | 6 million                 | 58%                       | —                                | —                                  | —                              | —                                     | —                                         | —                                      |
| 26               | Honduras                      | 6 million                 | 79%                       | 2 million                        | 3 million                          | 1 million                      | —                                     | —                                         | +                                      |
| 27               | Austria                       | 6 million                 | 72%                       | —                                | —                                  | —                              | —                                     | —                                         | —                                      |
| 28               | El Salvador                   | 5 million                 | 76%                       | 2 million                        | 3 million                          | <1 million                     | —                                     | —                                         | +                                      |
| 29               | Paraguay                      | 5 million                 | 92%                       | 1 million                        | <1 million                         | 3 million                      | —                                     | —                                         | +                                      |
| 30               | Nicaragua                     | 5 million                 | 82%                       | <1 million                       | 1 million                          | <1 million                     | —                                     | —                                         | +                                      |
| 31               | Burundi                       | 5 million                 | 65%                       | 1 million                        | 1 million                          | 2 million                      | 1 million                             | +                                         | —                                      |
|                  | Totals for Catholic countries | 818 million               |                           | 176 million                      | 168 million                        | 123 million                    | 29–34 million                         | 13/31                                     | 14/31                                  |
|                  | Worldwide                     | 6.87 billion <sup>9</sup> |                           | 807 million                      | 604 million                        | 576 million                    | 207 million                           |                                           |                                        |
|                  | Catholics                     | 12%                       |                           | 22%                              | 28%                                | 21%                            | 14%–16%                               | ND                                        | 100%                                   |

<sup>a</sup>Catholic populations by country from <http://www.catholic-hierarchy.org/country/sc1.html> [4].

<sup>b</sup>Only the top 31 Catholic countries with more than 5 million Catholics and countries in which at least 50% of the population is Catholic are included (as well as Canada and Uganda, each with more than 40% Catholic population), which excludes India, Indonesia, Kenya, Nigeria, and Vietnam.

<sup>c</sup>From [6,7].

<sup>d</sup>From [8,9].

<sup>e</sup>From [10,11].

<sup>f</sup>Chagas disease is found in every South American and Central American country listed [5].

<sup>g</sup>From [31].

doi:10.1371/journal.pntd.0001132.t001

packages of essential medicines in 14 countries including four of the 22 listed in Table 1, i.e., DRC, Haiti, the Philippines, and Uganda [20], while the British Department for International Development (DFID) is also supporting additional African countries [21]; both agencies are planning

to expand their NTD control activities in the coming years. Additional countries, including Burundi, are being supported through Legatum, Geneva Global, and the Global Network for NTDs [22].

In an earlier Editorial, I pointed out that it is unreasonable to expect the

United States and the United Kingdom to shoulder the entire burden of global NTD control and that we must look to other European countries, the Gulf Cooperation Council, and even some emerging economies for development assistance on this front [23]. But, in addition, the major

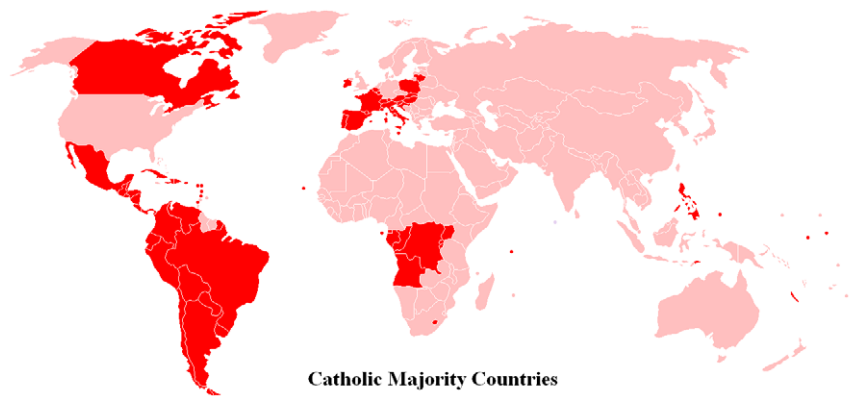

Catholic Majority Countries

**Figure 1. Catholic majority countries.** From [30].  
doi:10.1371/journal.pntd.0001132.g001

Catholic charities and the Catholic Church could re-organize some of their advocacy and resource mobilization programs to combat NTDs among the world's poorest Catholics, including national control programs in the 17 countries not currently supported by USAID, DFID, or the Global Network for NTDs. Efforts could include partnerships with the major Catholic majority endemic countries in Latin America, Africa, and the Philippines. Through mass administration with a package of preventive chemotherapy drugs costing as little as US\$0.50 annually [24,25], such global action could directly

benefit the 100–200 million Catholics suffering today from intestinal helminth infections, the roughly 30 million with schistosomiasis, and tens of millions with LF and/or onchocerciasis. Today, the so-called rapid impact packages of NTD control medicines are considered among the lowest cost interventions in all of global health, and one of the most cost-effective [1,25]. Partnerships with the Catholic Church or charities could also help to reduce the global disease burden of Chagas disease, which, because it is found almost exclusively in the countries of Latin America, is largely a disease of

Catholics, as well as selected indigenous groups [5].

The Catholic Church has also supported scientific research and development in tropical medicine, beginning with the origin of the antimalarial drug, quinine, from “Jesuit’s bark” or “Jesuit’s powder” [26,27]. Today, Rev. Thomas Streit, CSC, from the University of Notre Dame, is leading efforts to eliminate LF through mass drug administration in Haiti [28]. Science-based institutions such as the Pontifical Academy of Sciences founded by Pope Pius XI in the 1930s [29] could also provide important guidance for NTD research and new product development.

Expanded global public health efforts through programs of national control, stepped-up advocacy, and resource mobilization efforts by the major Catholic charities, nongovernmental development organizations affiliated with the Church, and of course the Holy See, could ultimately lead to reductions of one-quarter of the world’s intestinal helminth infections, 15% of the world’s schistosomiasis, and much of the world’s Chagas disease. At a modest cost of between US\$50 and US\$100 million annually, such global action would establish an amazing legacy for health and economic development by and for the global Catholic community.

## References

- Hotez PJ, Fenwick A, Savioli L, Molyneux DH (2009) Rescuing the “bottom billion” through neglected tropical disease control. *Lancet* 373: 1570–1574.
- Hotez PJ (2009) The neglected tropical diseases and their devastating health and economic impact on the member nations of the Organization of the Islamic Conference. *PLoS Negl Trop Dis* 3: e539. doi:10.1371/journal.pntd.0000539.
- Hotez PJ (2010) Nuclear weapons and neglected diseases: the “ten thousand to one gap”. *PLoS Negl Trop Dis* 4: e680. doi:10.1371/journal.pntd.0000680.
- Cheney DM (2010) Statistics by country by Catholic population. Available: <http://www.catholic-hierarchy.org/country/sc1.html>. Accessed 30 March 2011.
- Hotez PJ, Bottazzi ME, Franco-Paredes C, Ault SK, Roses Periago M (2008) The neglected tropical diseases of Latin America and the Caribbean: review of estimated disease burden and distribution and a roadmap for control and elimination. *PLoS Negl Trop Dis* 2: e300. doi:10.1371/journal.pntd.0000300.
- Bethony J, Brooker S, Albonico M, Geiger SM, Loukas A, et al. (2006) Soil-transmitted helminth infections: ascariasis, trichuriasis, and hookworm. *Lancet* 367: 1521–1532.
- de Silva NR, Brooker S, Hotez PJ, Montresor A, Engels D, Savioli L (2003) Soil transmitted helminth infections: updating the global picture. *Trends Parasitol* 12: 547–551.
- Steinmann P, Keiser J, Bos R, Tanner M, Utzinger J (2006) Schistosomiasis and water resources development: systematic review, meta-analysis, and estimates of people at risk. *Lancet Infect Dis* 6: 411–425.
- Chitsulo L, Engels D, Montresor A, Savioli L (2000) The global status of schistosomiasis and its control. *Acta Trop* 77: 41–51.
- Global Alliance to Eliminate Lymphatic Filariasis (2010) Global Alliance to Eliminate Lymphatic Filariasis. Available: <http://www.filaria.org/>. Accessed 11 September 2010.
- African Programme for Onchocerciasis Control (2010) African Programme for Onchocerciasis Control. Available: <http://www.who.int/apoc/en/>. Accessed 11 September 2010.
- Hackett K, Piraino D (2006) Embracing global solidarity. *Health Prog* 87A: 14–19.
- Hennigan M (2007) Catholic Relief Services provides health and hope in the developing world. *Md Med* 8: 10, 12.
- Catholic Relief Services (2011) CRS work in Benin. Available: <http://crs.org/benin/projects.cfm>. Accessed 28 March 2011.
- Catholic Relief Services (2011) CRS work in Ghana. Available: <http://crs.org/ghana/projects.cfm>. Accessed 28 March 2011.
- Catholic Relief Services (2011) Africa. Available: <http://crs.org/africa/>. Accessed 28 March 2011.
- Catholic Relief Services (2011) Health. Available: <http://crs.org/health/>. Accessed 28 March 2011.
- Catholic Medical Mission Board (2010) Our history. Available: <http://www.cmmmb.org/our-history>. Accessed 28 March 2011.
- Archdiocese of Manila (2003) Caritas Manila. Available: <http://www.rcam.org/ministry/socialservices/caritas.htm>. Accessed 28 March 2011.
- USAID (2010) USAID’s NTD program. Available: <http://www.neglecteddiseases.gov/>. Accessed 30 March 2011.
- Crompton D, Pearson M, DFID Health Resource Centre (2009) DFID support to the control of neglected tropical diseases: the context. London: DFID Health Resource Centre.
- The Global Network for Neglected Tropical Diseases (2010) The Global Network for Neglected Tropical Diseases. Available: <http://www.globalnetwork.org/>. Accessed 30 March 2011.
- Hotez PJ (2010) Neglected tropical disease control in the “post-American world”. *PLoS Negl Trop Dis* 4: e812. doi:10.1371/journal.pntd.0000812.
- Hotez PJ (2009) Mass drug administration and the integrated control of the world’s high prevalence neglected tropical diseases. *Clin Pharmacol and Therap* 85: 659–664.
- Hotez PJ (2010) A plan to defeat neglected tropical diseases. *Sci Am* 302: 90–96.
- Knight K (2010) Jesuit’s bark. New Advent Web site. Available: <http://www.newadvent.org/cathen/08372b.htm>. Accessed 30 March 2011.
- Harris SJ (2005) Jesuit scientific activity in the overseas missions, 1540–1173. *Isis* 96: 71–79.
- Streit T, Lafontant JG (2008) Eliminating lymphatic filariasis: a view from the field. *Ann NY Acad Sci* 1136: 53–63.
- Vatican City State (2010) Pontifical Academy of Sciences. Available: [http://www.vatican.va/roman\\_curia/pontifical\\_academies/acds/index.html](http://www.vatican.va/roman_curia/pontifical_academies/acds/index.html). Accessed 30 March 2011.
- Wikimedia Commons (2010) Catholic majority countries. Available: [http://commons.wikimedia.org/wiki/File:Catholic\\_Majority\\_Countries.PNG](http://commons.wikimedia.org/wiki/File:Catholic_Majority_Countries.PNG). Accessed 30 March 2011.
- US Census Bureau (2011) U.S. & world population clocks. Available: <http://www.census.gov/main/www/popclock.html>. Accessed 30 March 2011.
